1 **PTY 2 AS DPP-IV INHIBITOR PREVENTS INTESTINAL CELL'S APOPTOSIS**

2 **Short Title: PTY 2 PROTECTS INTESTINE**

3 **Shivani Srivastava<sup>1</sup>, Harsh Pandey<sup>1</sup>, Surya K Singh<sup>2</sup>, Yamini Bhusan Tripathi<sup>1\*</sup>.**

4 <sup>1</sup>Department of Medicinal Chemistry, Institute of Medical Sciences, Banaras Hindu University, India.

5 <sup>2</sup>Department of Endocrinology and Metabolism, Institute of Medical Sciences, Banaras Hindu University, India.

6 **Corresponding author\***

7 Department of Medicinal Chemistry,

8 Institute of Medical Sciences, BHU

9 yaminibiochemist6@gmail.com

10

11

12 **ABSTRACT**

13 Enhanced DPP-IV expression is found to get enhanced in various intestinal diseases. PTY-2 has already been known to have DPP-IV inhibitory  
14 potential. This inhibition has not yet been studied at mRNA level. Increased incretin secretion due to DPP-IV inhibition could lead to  
15 suppression of stress & intestinal cells apoptosis. Through histological analysis, we have found morphological damage of intestine after STZ  
16 injection (65 mg/kg bw) to male Charles foster rats. mRNA expressions were analyzed by PCR and apoptosis of cells was checked through

17 tunnel assay & Bcl 2 expression. The number and length of villi get reduced in STZ induced diabetic control, but these damages have been  
18 getting reversed after the PTY-2 treatment for 10 days. The expression of SOD was found to get reduced while that of DPP-IV was enhanced in  
19 diabetic control group along with significant intestinal cell apoptosis. PTY-2 treatment reduces the stress by upregulating the expression of SOD  
20 and through downregulation of DPP-IV mRNA expression. These recoveries by PTY-2 leads to suppression of intestinal cells apoptosis. These  
21 short studies explain the protective action of PTY-2 against STZ induced intestinal damage. Hence, PTY-2 could be taken as an herbal treatment  
22 against intestinal disorders in case of chronic diabetes.

23 **KEYWORDS:** *Pueraria tuberosa*, Diabetic Complications, DPP-IV, Streptozotocin, Apoptosis.

24

## 25 **1.BACKGROUND**

26 Since 1963, STZ has been used to induce diabetic experimental models. The STZ enters via GLUT 2 transporter and harms  $\beta$  cells through DNA  
27 methylation and by acting as a nitric oxide donor. In addition to pancreatic  $\beta$  cells, the GLUT 2 transporters are also responsible for STZ uptake  
28 into the epitheliocytes of the intestinal mucosa, cells of renal tubules and hepatocytes. It means that, STZ is toxic to other organs on those cells  
29 which express the GLUT 2 transporter(Akinola et al., 2009). Several herbals has been studied to improve the intestinal deformities against STZ  
30 induced diabetes like *Azadirachta indica*(Akinola et al., 2009), Green tea extract and ginseng root(Karaca et al., 2011).

31 According to the previous study, the differentiation-dependent expression of DPP-IV in crypt-villus axis of rat jejunum is primarily controlled at  
32 the level of mRNA(Darmoul et al., 1991). Promotion and formation of intestinal ulcers are also known to be inhibited by DPP-IV  
33 inhibition(Inoue et al., 2014). GLP-2, a hormone responsible for intestinal growth is usually found to be inhibited by DPP-IV in rats. The DPP-  
34 IV inhibition by valine-pyrrolidide (VP), reduces the GLP-2 degradation and enhances its intestinotrophic effect (Hartmann et al., 2000).

35 We have already reported the DPP-IV inhibitory role of PTY 2 in blood and intestinal homogenate(Srivastava et al., 2015, 2017, 2018b). Here,  
36 we have further studied the mRNA expression of DPP-IV in the intestinal duodenum and used this property in designing our study focused to  
37 STZ induced intestinal damage. *Pueraria tuberosa* have positive role as antioxidant(Pandey and Tripathi, 2010) & anti-inflammatory(Pandey et  
38 al., 2013) agent. It is highly effective in the treatment of diabetes(Srivastava et al., 2015, 2017, 2018a), nephropathy(Tripathi et al., 2017), anti-  
39 hypertension(Verma et al., 2012), anxiolytic(Pramanik et al., 2010) etc. Steroid, glycoside, triterpenoid, flavanoid, carbohydrate, tannin, protein,  
40 alkaloids and amino acids are the main constituents of *Pueraria tuberosa* like puerarin 4',6'-diacetate, tuberosin, daidzin, genistein, puerarin,  
41 puetuberosanol, puerarone & tuberostan(Asthana et al., 2015; Srivastava et al., 2015; Tripathi and Kohli, 2013). We have hypothesized that PTY  
42 2 treatment could be responsible for the improvement of intestinal morphology against STZ induced damage.

43 .

## 44 **2. MATERIALS AND METHODS**

45

### 46 **2.1 MATERIALS**

47 For RT-PCR, Trizol (Himedia, Pvt. Ltd, Kolkata, India), cDNA Kit (Fermentas), and Taq-polymerase (GenaxyScientific Pvt.Ltd) were used.

48

### 49 **2.2 SAMPLE PREPARATION**

50 *Pueraria tuberosa* was purchased from Ayurvedic Pharmacy, Banaras Hindu University. Its authenticity has already been ascertained in our  
51 previous research (Pandey and Tripathi, 2010). 30 g of tuber powder were extracted with 8 volumes of distilled water. When the volume reduced  
52 to one-fourth, the obtained extract then filtered. The total yield obtained was 30% (Srivastava et al., 2018a).

53

### 54 **2.3 ANIMALS DESIGN**

55

56 After acclimatization, Charles Foster male rats of the same age group and a weight range of 120-130 g were injected STZ (65 mg/kg bw),  
57 prepared in fresh and chilled citrate buffer (pH 4.5), after fasting for 8 hrs. With the use of glucometer strips (Dr. Morepen), the diabetic  
58 condition was checked on the 5th day. The rats with blood glucose level above 200 mg/dL were considered diabetic and kept for 60 days in  
59 order to induce chronic diabetes. On 61th day, the rats were divided into three groups (n=6): Group-1 (STZ untreated rats, i.e., age-matched  
60 normal control), Group-2 (diabetic control), and Group-3 (PTY-2 at 50 mg/100 g bw treatment for 10 days to diabetic rats). After 10 days, the  
61 rats were sacrificed and intestine samples were isolated. Each intestine sample was cut into two parts; one for histology and IHC (preserved in  
62 10% formaldehyde) and the other was first crushed in liquid nitrogen and then stored in -80°C freezer for molecular study (Srivastava et al.,  
63 2018a).

64

#### 65 **2.4 HEMATOXYLIN-EOSIN (H & E) STAINING**

66 Intestinal tissues fixed with formalin were embedded in paraffin wax. Using Leica RM2125 RT rotator microtome (Leica Biosystems Nussloch  
67 GmbH, Nussloch, Germany), the tissues were cut into 4 µm thick sections. Each section, were later stained with hematoxylin-eosin (HE) and  
68 then imaged & observed using Nikon microscope (Eclipse 50i, loaded with imaging software-NIS Elements Basic research).

#### 69 **2.5 TUNNEL ASSAY**

70 Apoptosis assay was done using “TACS® 2 TdT Fluorescein Kit - Trevigen”.

71

#### 72 **2.6 IMMUNO-HISTOCHEMICAL STAINING**

73

74 Dewaxed the intestinal tissues using xylene for 10 min and through 90 % , 70 % alcohol and water, tissues were then rehydrated serially in each  
75 for 5 min. Then after, each slides get dipped in citrate buffer and proceeded for antigen retrieval by using EZ Retrieval System V.3 (Bio Genex).  
76 Sections were washed two times with PBS for 10 min each, and then blocked with 0.1% Triton X-100, 0.1% BSA, 10% FCS, 0.1% sodium  
77 deoxycholate and 0.02% Thiomersal (anti-fungal agent) in 1X PBS for 2 h at room temperature (RT). All sections were then incubated overnight  
78 with the primary antibodies at 4°C and then washed with PBST (0.1% triton X in 1XPBS) thrice for 10 min each, followed by incubating each  
79 sections with anti-rabbit-AF 546 (Red) (Invitrogen, USA) secondary antibodies at RT for 2 h. Again washed thrice in PBST for 10 min each.  
80 Finally, counterstained with DAPI (1 µg/ml DAPI in 1XPBS) and mounted on DABCO. Using Zeiss LSM510 Meta confocal microscope all the  
81 slides were examined. Zen Black (2012) software was used for image analysis.

## 82 **2.7 REVERSE TRANSCRIPTION-POLYMERASE CHAIN REACTION (RT-PCR)**

83 Using trizol, we have homogenized 50 mg of intestinal tissue. With random hexamers and superscript II RNase H-reverse transcriptase (RT), 5  
84 µg of total RNA was reverse-transcribed. For DPP-IV, 2µl c-DNA, 0.2 mmol/L dNTPs, 1.5 mmol/L MgCl<sub>2</sub>, 0.5 µmol/L of each primer, 2.5µl  
85 10X PCR buffer and 1U Taq DNA polymerase were used. For Glyceraldehyde 3-phosphate dehydrogenase (GAPDH), 0.1 µmol/L of each  
86 primer was used. Expressions optical density were determined and presented as ratio against GAPDH with the help of alpha imager (Bio-Rad).  
87 All the expressions were checked in triplicate (Table 1).

88

## 89 **3. RESULTS**

90 **3.1 HISTOLOGICAL EXAMINATION** STZ treatment reduced the overall length and number of intestinal villi. The PTY 2 significantly  
91 prevented/ reversed the STZ induced intestinal changes in 10 days of treatment. This treatment with PTY 2 could be enhancing the surface area  
92 of intestine, leading to enhanced absorption of nutrients and minerals ( Figure 1).

93 **3.2 APOPTOSIS**

94 Tunnel assay is aimed to assess the degree of apoptosis in cells. The sections of STZ control groups showed significant damage accompanied  
95 with cell apoptosis. However, the PTY 2 treatment for 10 days, significantly prevented this change ( Figure 2).

96 Immunohistochemistry analysis also proved the antiapoptotic effect of PTY 2 on intestinal cells. It significantly reversed the downregulation of  
97 Bcl 2 expression induced by STZ (Figure 3).

98 **3.3 mRNA EXPRESSIONS**

99 PTY 2 recovers the STZ induced stress, as a result the expression of SOD was significantly enhanced. In the other hand, we have also found the  
100 reduced mRNA expression of stress marker DPP-IV in PTY 2 treated group. This clearly shows the potential of PTY 2 against STZ induced  
101 intestinal damage ( Figure 4).

102 **4. DISCUSSIONS**

103 During diabetes, the morphologies and functions of small intestine gets highly altered. Some of this alterations is caused by the oxidative stress  
104 raised during the diabetic complications, studied in STZ induced diabetic rats(Bhor et al., 2004).Increase in the intestinal DPP-IV activity is  
105 associated with diabetes development(Yang et al., 2007). In our case, the enhanced expression of DPP-IV and deformities of intestinal  
106 morphology by STZ clearly indicates its high uptake by intestinal mucosa as discussed above. PTY 2 recovers this damages by upregulating the  
107 antioxidant enzyme SOD and downregulating DPP-IV mRNA expressions (Figure 4). Thus, reduced stress leads to the significant increase in  
108 the number and length of villi as compared to STZ treated group (Figure 1). The apoptosis assay and Bcl 2 protein expression also showed the  
109 antiapoptotic and protective effect on intestinal cells by PTY 2 (Figure 2 &3).

110 Glucagon like peptides plays an important role towards gut adaptation. After their synthesis, they get released into the intestine from the  
111 enteroendocrine cells. GLP-1 efficiently assimilates nutrients while GLP 2 act as a regulator of energy absorption, mucosal integrity &

112 permeability(Drucker, 2002). Both GLP-1 and GLP 2 proven to play the essential regenerative and healing role against intestinal injury in  
113 mice(Hytting-Andreasen et al., 2018). Through the mechanism involving Fgf 7, GLP-1R improves both small and large bowel growth(Koehler  
114 et al., 2015).

115 In our previous works, we have already proved PTY 2 as incretin therapeutic agent. It significantly inhibits DPP-IV and enhances the levels of  
116 GLP-1 and GIP. In addition to DPP-IV inhibition, it also act as incretins receptor agonist(Srivastava et al., 2015, 2017, 2018a, 2018b). Thus, as  
117 DPP-IV inhibitor, PTY 2 must also enhances the intestinotrophic effect of GLP 2, in addition to GLP-1 and its receptor.

118 In sprague dawley diabetic rat model, STZ altererd the microbiota compositons and decreased the microbial diversity with time(Patterson et al.,  
119 2015). PTY 2 improves the villi count and length, thus enhances the surface area in order to assimilate more nutrients from diet and could also  
120 provide the maximum space for colonization of positive bacteria useful for intestinal health. A detail study is needed to reveal the role of PTY 2  
121 and its individual active constituents in future at both molecular and microbial level against diabetic complications.

122

## 123 **5. CONCLUSION:**

124 PTY 2 recovers the STZ induced stress, improves the intestinal morphology, increases the villi number and length as well as prevents apoptosis.

125 As DPP-IV inhibitor, PTY 2 acts as an effective herbal agents for the treatment of intestinal diseases (Figure 5).

126

## 127 **6. CONSENT FOR PUBLICATION**

128 Not Applicable

## 129 **7. AVAILABILITY OF DATA AND MATERIALS**

130 The data and materials supporting the conclusions of this work are included in the article.

## 131 **8. COMPETING INTERESTS**

132 The authors, ethical committee, and funding agencies declared no conflict of interest.

## 133 **9. ABBREVIATIONS**

134 PTY 2 (*Pueraria tuberosa* water extract), DPP-IV (Dipeptidyl Peptidase IV), STZ (Streptozotocin), SOD (*Superoxide dismutase*).

135 **10. FUNDING**

136 This is a project of the Department of Biotechnology (DBT) (P-07/547) and University Grant Commission (UGC-RGNFD) (F./2013-14/RGNF-  
137 2013-14D-GEN-UTT-50872), Government of India.

138 **11. ACKNOWLEDGMENT**

139 We are thankful to Prof. Shail Kumar Chaube and his students, Department of Zoology, Institute of Sciences, BHU, for their help in tunnel  
140 assay.

141 **12. ETHICS APPROVAL AND CONSENT TO PARTICIPATE**

142 Institute Ethical Committee (Dean/2015/CAEC/1266), Institute of Medical Sciences, Banaras Hindu University has approved the overall  
143 protocol.

145 **13. REFERENCES**

146  
147 Akinola, O. B., Zatta, L., Dosumu, O. O., Akinola, O. S., Adelaja, A. A., Dini, L., et al. (2009). Intestinal lesions of streptozotocin-induced  
148 diabetes and the effects of *Azadirachta indica* treatment. *Pharmacologyonline* 3, 872–881.

149 Asthana, S., Agarwal, T., Singothu, S., Samal, A., Banerjee, I., Pal, K., et al. (2015). Molecular Docking and Interactions of *Pueraria Tuberosa*  
150 with Vascular Endothelial Growth Factor Receptors. *Indian J. Pharm. Sci.* 77, 439–45.

151 Bhor, V. M., Raghuram, N., and Sivakami, S. (2004). Oxidative damage and altered antioxidant enzyme activities in the small intestine of  
152 streptozotocin-induced diabetic rats. *Int. J. Biochem. Cell Biol.* 36, 89–97. Available at: <http://www.ncbi.nlm.nih.gov/pubmed/14592535>

153 [Accessed February 10, 2019].



154 Darmoul, D., Rouyer-Fessard, C., Blais, A., Voisin, T., Sapin, C., Baricault, L., et al. (1991). Dipeptidyl peptidase IV expression in rat jejunal  
155 crypt-villus axis is controlled at mRNA level. *Am. J. Physiol.* 261, G763-9. doi:10.1152/ajpgi.1991.261.5.G763.

156 Drucker, D. J. (2002). Gut adaptation and the glucagon-like peptides. *Gut* 50, 428–35. Available at:  
157 <http://www.ncbi.nlm.nih.gov/pubmed/11839727> [Accessed February 11, 2019].

158 Hartmann, B., Thulesen, J., Kissow, H., Thulesen, S., Orskov, C., Ropke, C., et al. (2000). Dipeptidyl Peptidase IV Inhibition Enhances the  
159 Intestinotrophic Effect of Glucagon-Like Peptide-2 in Rats and Mice. *Endocrinology* 141, 4013–4020. doi:10.1210/endo.141.11.7752.

160 Hytting-Andreasen, R., Balk-Møller, E., Hartmann, B., Pedersen, J., Windeløv, J. A., Holst, J. J., et al. (2018). Endogenous glucagon-like  
161 peptide- 1 and 2 are essential for regeneration after acute intestinal injury in mice. *PLoS One* 13, e0198046.  
162 doi:10.1371/journal.pone.0198046.

163 Inoue, T., Higashiyama, M., Kaji, I., Rudenkyy, S., Higuchi, K., Guth, P. H., et al. (2014). Dipeptidyl peptidase IV inhibition prevents the  
164 formation and promotes the healing of indomethacin-induced intestinal ulcers in rats. *Dig Dis Sci* 59, 1286–1295. doi:10.1007/s10620-013-  
165 3001-6.

166 Karaca, T., Uslu, S., and Yörük, M. (2011). Effects of green tea and ginseng on villus length and crypt depth and on the distribution of mast and  
167 goblet cells in the small intestine of rats with streptozotocin (stz)-induced diabetes. *Philipp. J. Vet. Med.* 48, 86–94.

168 Koehler, J. A., Baggio, L. L., Yusta, B., Longuet, C., Rowland, K. J., Cao, X., et al. (2015). GLP-1R Agonists Promote Normal and Neoplastic  
169 Intestinal Growth through Mechanisms Requiring Fgf7. *Cell Metab.* 21, 379–391. doi:10.1016/j.cmet.2015.02.005.

170 Pandey, N., and Tripathi, Y. B. (2010). Antioxidant activity of tuberosin isolated from *Pueraria tuberosa* Linn. *J. Inflamm. (Lond)*. 7, 47.  
171 doi:10.1186/1476-9255-7-47.

172 Pandey, N., Yadav, D., Pandey, V., and Tripathi, Y. B. (2013). Anti-inflammatory effect of *Pueraria tuberosa* extracts through improvement in  
173 activity of red blood cell anti-oxidant enzymes. *Ayu* 34, 297–301. doi:10.4103/0974-8520.123131.

174 Patterson, E., Stanton, C., Cryan, J. F., Fitzgerald, G. F., Ross, R. P., Dinan, T. G., et al. (2015). Streptozotocin-induced type-1-diabetes disease  
175 onset in Sprague–Dawley rats is associated with an altered intestinal microbiota composition and decreased diversity. *Microbiology* 161,

176 182–193. doi:10.1099/mic.0.082610-0.

177 Pramanik, S. S., Sur, T. K., Debnath, P. K., and Bhattacharyya, D. (2010). Effect of Pueraria tuberosa tuber extract on chronic foot shock stress  
178 in Wistar rats. *Nepal Med. Coll. J.* 12, 234–8.

179 Srivastava, S., Koley, T. K., Singh, S. K., and Tripathi, Y. B. (2015). The tuber extract of pueraria tuberosa Linn. competitively inhibits DPP-IV  
180 activity in normoglycemic rats. *Int. J. Pharm. Pharm. Sci.* 7, 227–231. Available at: <http://www.scopus.com/inward/record.url?eid=2-s2.0-84940641661&partnerID=MN8TOARS>.  
181

182 Srivastava, S., Shree, P., Pandey, H., and Tripathi, Y. B. (2018a). Incretin hormones receptor signaling plays the key role in antidiabetic potential  
183 of PTY-2 against STZ-induced pancreatitis. *Biomed. Pharmacother.* 97, 330–338. doi:10.1016/j.biopha.2017.10.071.

184 Srivastava, S., Shree, P., and Tripathi, Y. B. (2017). Active phytochemicals of Pueraria tuberosa for DPP-IV inhibition: In silico and  
185 experimental approach. *J. Diabetes Metab. Disord.* 16, 46. doi:10.1186/s40200-017-0328-0.

186 Srivastava, S., Yadav, D., and Tripathi, Y. (2018b). DPP-IV Inhibitory Potential of Methanolic Extract of Pueraria Tuberosa in Liver of Alloxan  
187 Induced Diabetic Model. *Biosci. Biotechnol. Res. Asia* 15, 01–04. doi:10.13005/bbra/2602.

188 Tripathi, A. K., and Kohli, S. (2013). Anti-Diabetic Activity and Phytochemical Screening of Crude Extracts of PuerariaTuberosa DC.  
189 (FABACEAE) Grown in India on STZ -Induced Diabetic Rats. *Asian J. Med. Pharm. Res* 3, 66–73.

190 Tripathi, Y. B., Shukla, R., Pandey, N., Pandey, V., and Kumar, M. (2017). An extract of *Pueraria tuberosa* tubers attenuates diabetic  
191 nephropathy by upregulating matrix metalloproteinase-9 expression in the kidney of diabetic rats. *J. Diabetes* 9, 123–132.  
192 doi:10.1111/1753-0407.12393.

193 Verma, S. K., Jain, V., and Singh, D. P. (2012). Effect of Pueraria tuberosa DC. (Indian Kudzu) on Blood Pressure, Fibrinolysis and Oxidative  
194 Stress in Patients with Stage 1 Hypertension. *Pakistan J. Biol. Sci.* 15, 742–747. doi:10.3923/pjbs.2012.742.747.

195 Yang, J., Campitelli, J., Hu, G., Lin, Y., Luo, J., and Xue, C. (2007). Increase in DPP-IV in the intestine, liver and kidney of the rat treated with  
196 high fat diet and streptozotocin. *Life Sci.* 81, 272–279. doi:10.1016/j.lfs.2007.04.040.

197

198

## 199 **Figure Legends**

200

201 **Fig. 1** H & E staining to measure the morphological changes of intestinal villi. PTY-2 treatment showed a recovery of STZ-induced villi  
202 damage. The image was taken at 20X magnification. Scale bar 100  $\mu$ m.

203

204 **Fig. 2** Tunnel assay analysis showed the effect of PTY-2 on intestinal cells apoptosis. PTY 2 recovers the apoptosis induced by STZ. The image  
205 was taken at 40X magnification. Scale bar 100  $\mu$ m. The brownish color indicate the TUNEL-positive area.

206

207 **Fig. 3** Immunohistochemistry analysis showed the effect of PTY-2 on the expression of Bcl 2 in the intestine of normal, diabetic control, and  
208 PTY-2-treated rats. The expression was merged with DAPI (blue). In comparison to diabetic control, PTY-2 up regulated the expression of Bcl  
209 2. The image was taken at 63X magnification. Scale bar was 20  $\mu$ m. The intensity was measured in pixel values. Each value represent the mean  
210  $\pm$  SD (n=6); \*\*\*  $P < 0.05$ , compared with normal, #  $P < 0.05$ , compared with diabetic control.

211 **Fig. 4** mRNA expression of SOD and DPP-IV to investigate the effect of PTY-2 on the intestinal tissues of normal, diabetic control and PTY-2  
212 treated rats. Each value represent the mean  $\pm$  SD (n=6); \*\*\*  $P < 0.05$ , compared with normal, #  $P < 0.05$ , compared with diabetic control.

213 **Fig. 5** Signaling pathway of PTY-2 acting against diabetes induced intestinal damage.

214

215

216

217 **Table 1** Details of PCR primer sequences, product size and thermal steps for expressions of SOD, DPP-IV and GAPDH.

218

| Primers            | Sequence                                 | Product Size (bp) | RT PCR Thermal steps       |                                            |          |         |           |                 |
|--------------------|------------------------------------------|-------------------|----------------------------|--------------------------------------------|----------|---------|-----------|-----------------|
|                    |                                          |                   |                            | Initial denaturation                       | Denature | Anneal  | Extention | Final Extention |
| <b>DPP-IV FORW</b> | 5'-<br>ACTACTAC<br>TACGATTC<br>CCATG -3' | 546               | No. of Cycle               | 1                                          | 30       |         |           | 1               |
|                    |                                          |                   | Temp. (°C)                 | 95                                         | 95       | 55      | 72        | 72              |
| <b>DPP-IV REV</b>  | 5'-<br>TGACAGA<br>CCTGTTCG<br>GG -3'     |                   | Time                       | 2 min.                                     | 1 min.   | 1 min.  | 2 min.    | 5 min.          |
|                    |                                          |                   | No. of Cycle               | 1                                          | 35       |         |           | 1               |
| <b>SOD FORW</b>    | 5'-<br>TCTAAGAA<br>ACATGGC<br>GGTCC-3'   |                   | Temp. (°C)                 | 94                                         | 94       | 55      | 72        | 72              |
|                    |                                          |                   | <b>SOD REV</b>             | 5'-<br>CAGTTAGC<br>AGGCCAG<br>C<br>AGAT-3' | Time     | 3 min.  | 45 sec.   | 30 sec.         |
| <b>GAPDH FORW</b>  | 5'-<br>CACGGCA<br>AGTTCAAT<br>GGCACA-3'  | No. of Cycle      |                            |                                            | 1        | 35      |           |                 |
|                    |                                          | <b>GAPDH REV</b>  | 5'-<br>GAATTGTG<br>AGGGAGA | Temp. (°C)                                 | 94       | 94      | 58        | 72              |
| Time               | 3 min.                                   |                   |                            | 30 sec.                                    | 30 sec.  | 45 sec. | 5 min.    |                 |

219  
220  
221

|  |          |  |  |  |  |  |  |  |  |
|--|----------|--|--|--|--|--|--|--|--|
|  | G        |  |  |  |  |  |  |  |  |
|  | TGCTC-3' |  |  |  |  |  |  |  |  |

222  
223  
224  
225  
226  
227

Normal

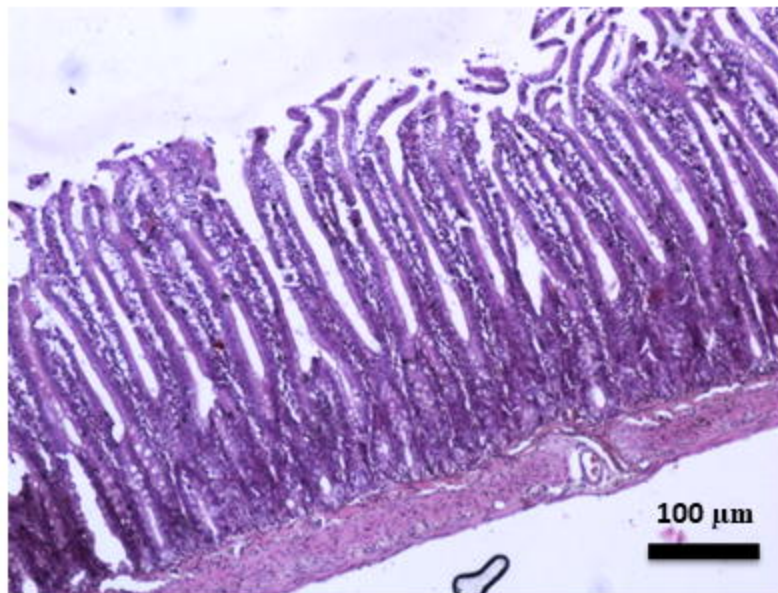

Diabetic Control

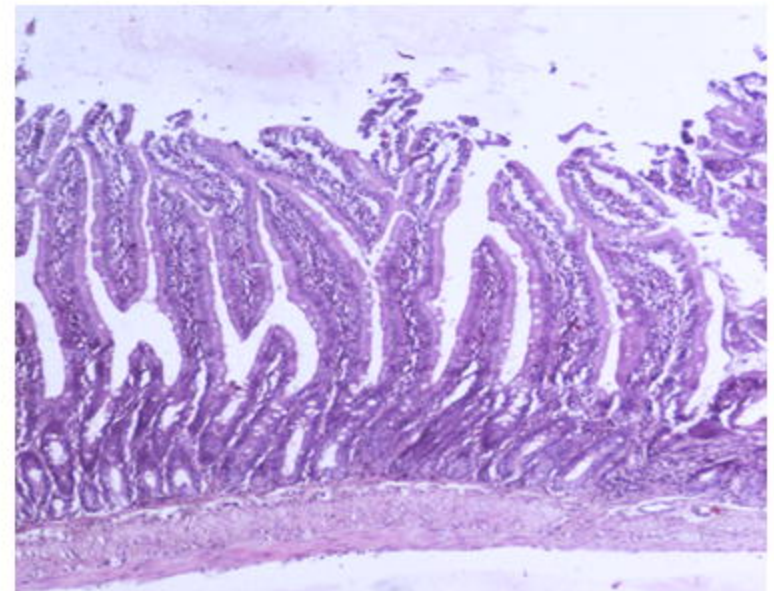

PTY 2

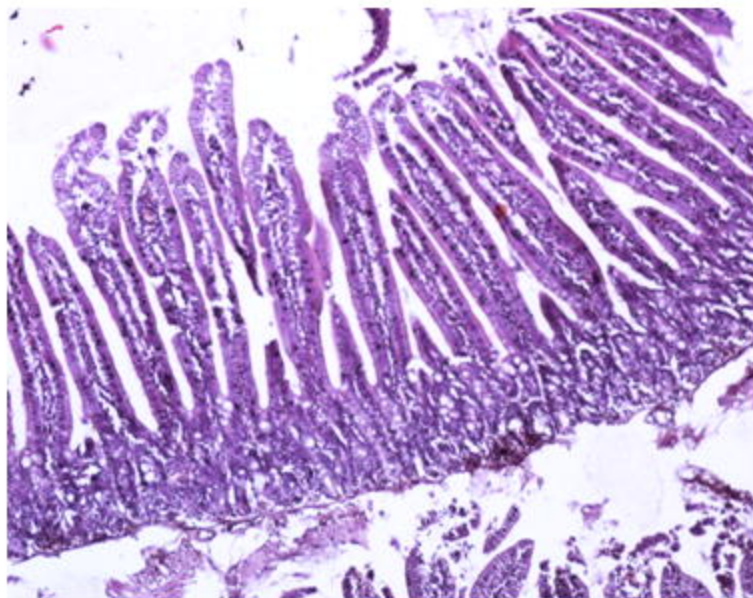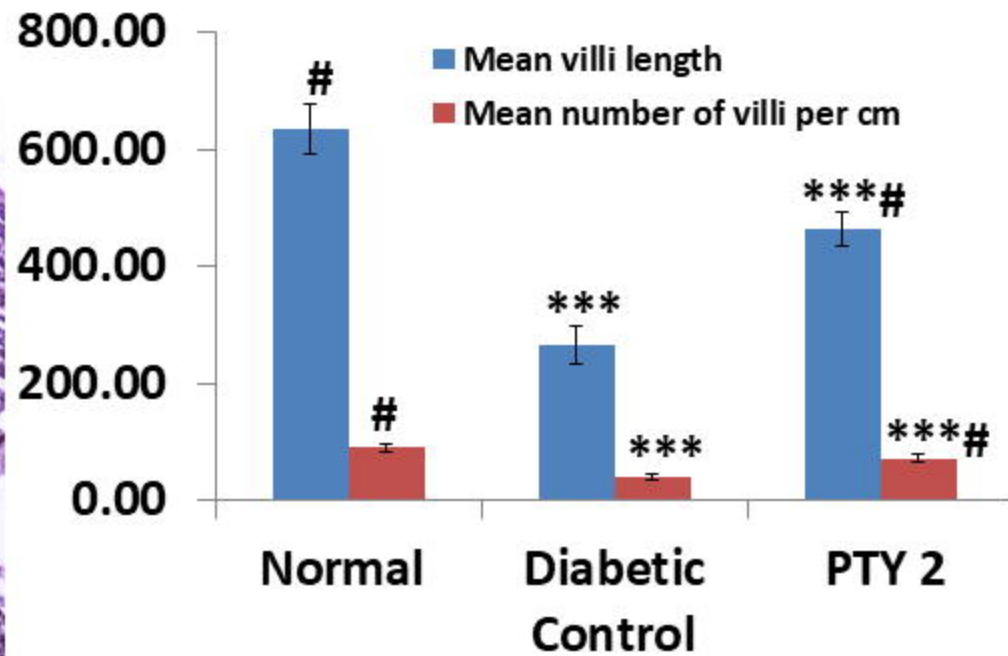

Normal

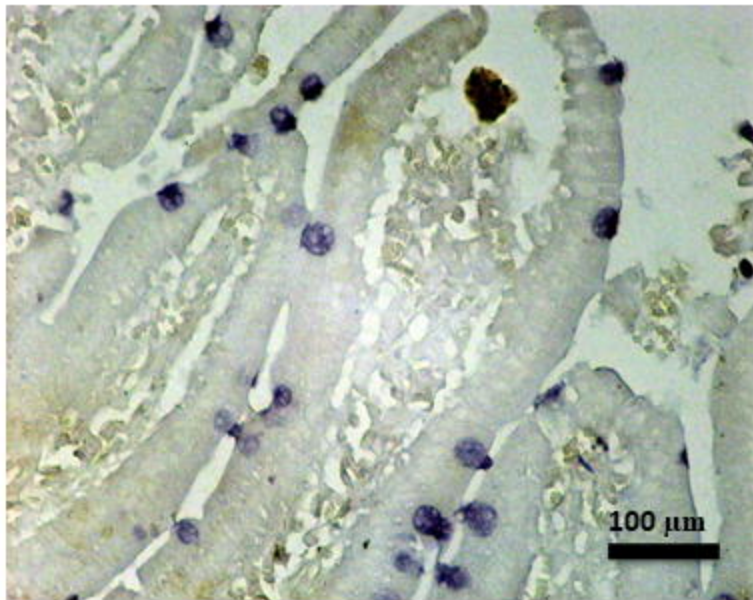

Diabetic Control

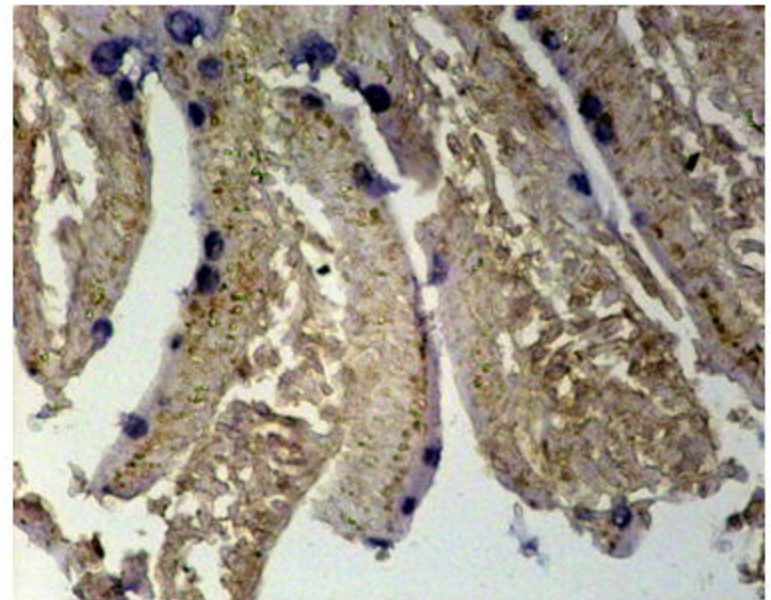

PTY 2

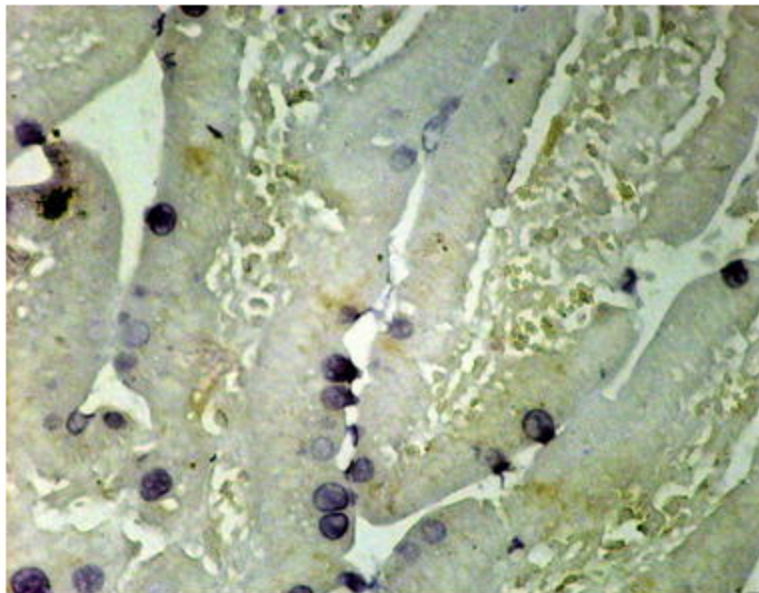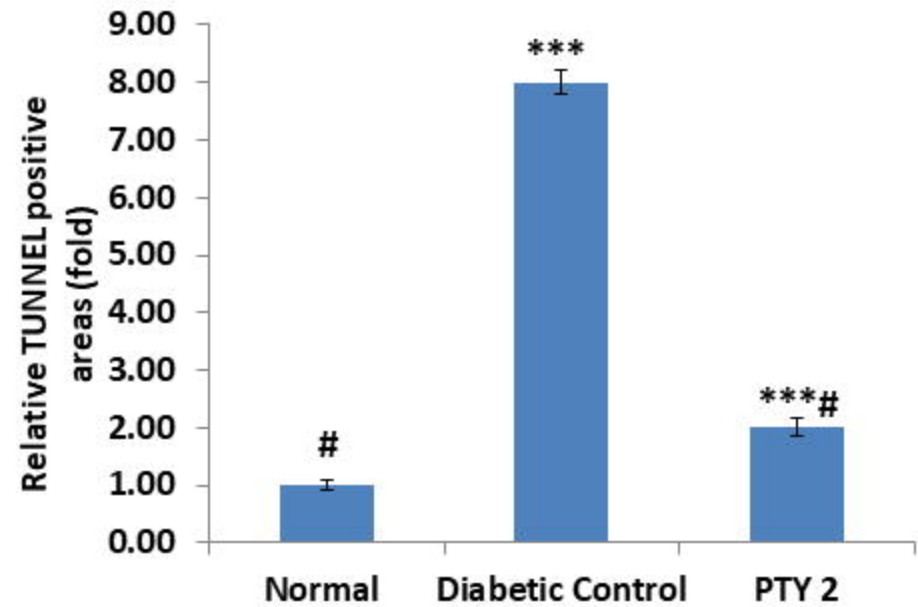

**Bcl 2****DAPI****MERGE**

Normal

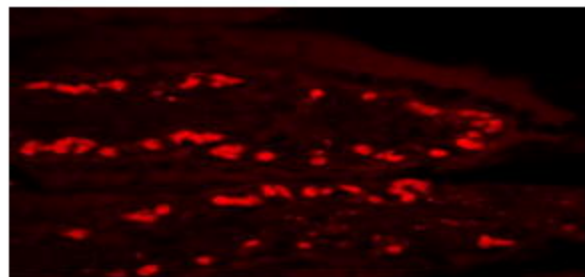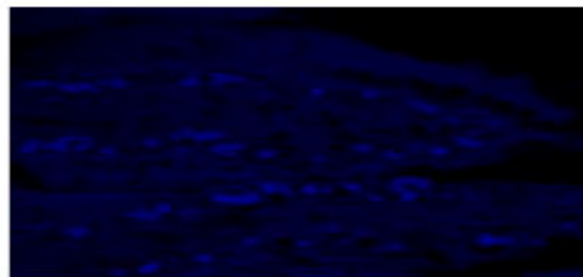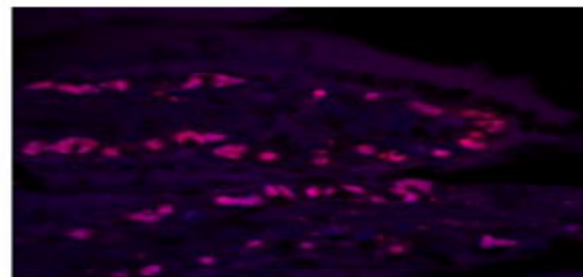

Diabetic Control

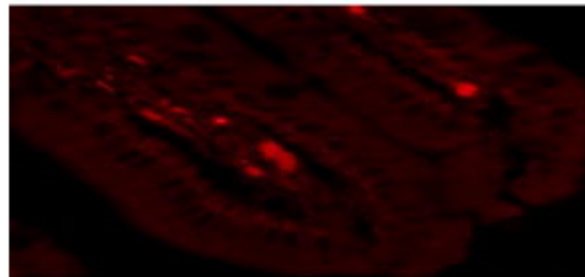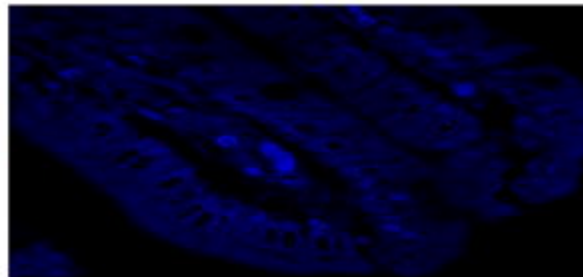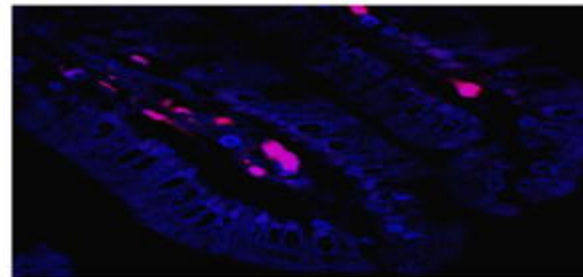

PTY 2

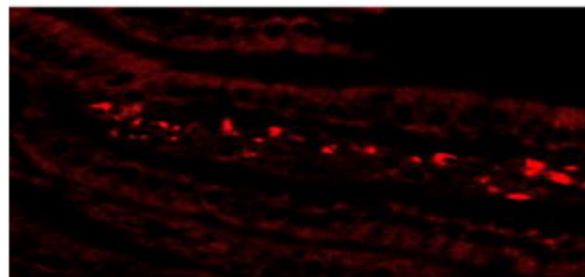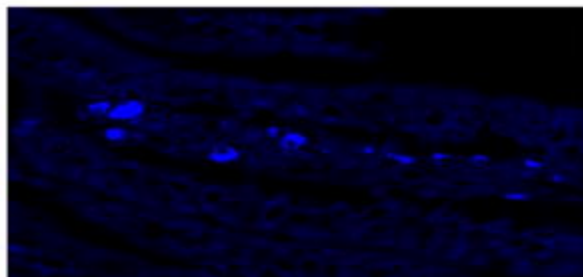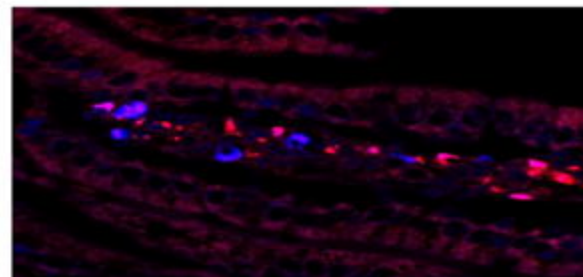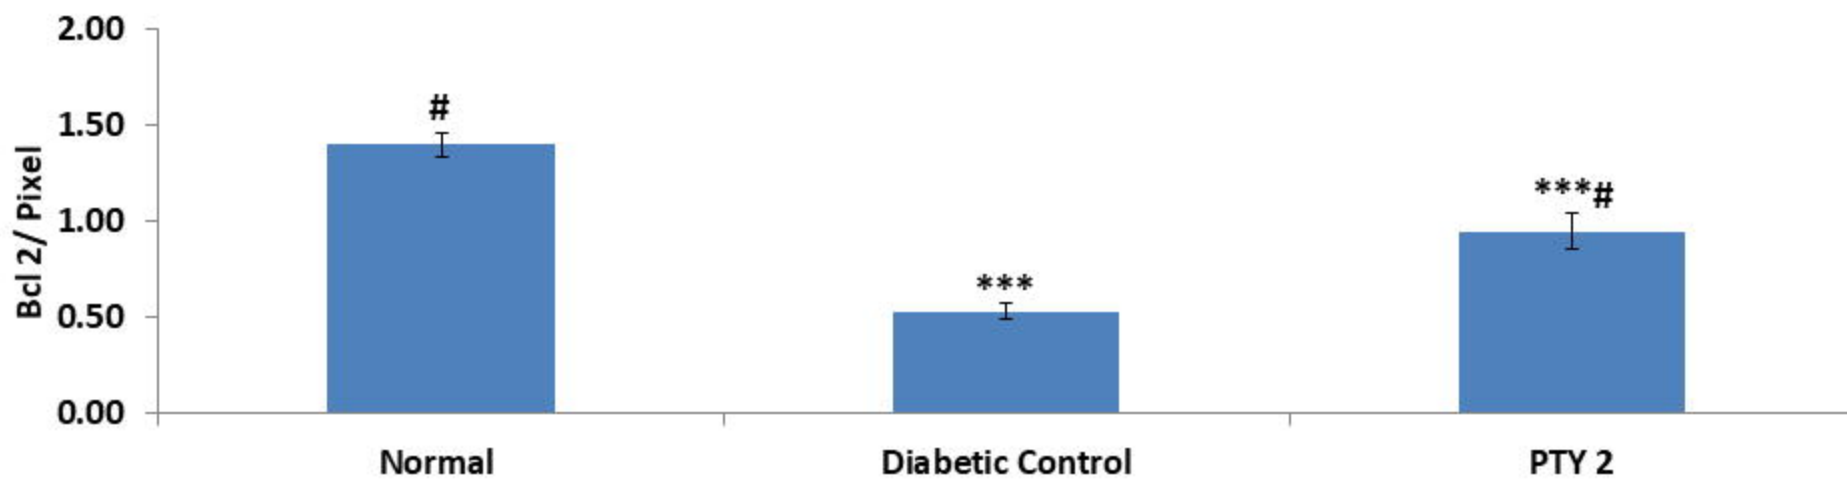



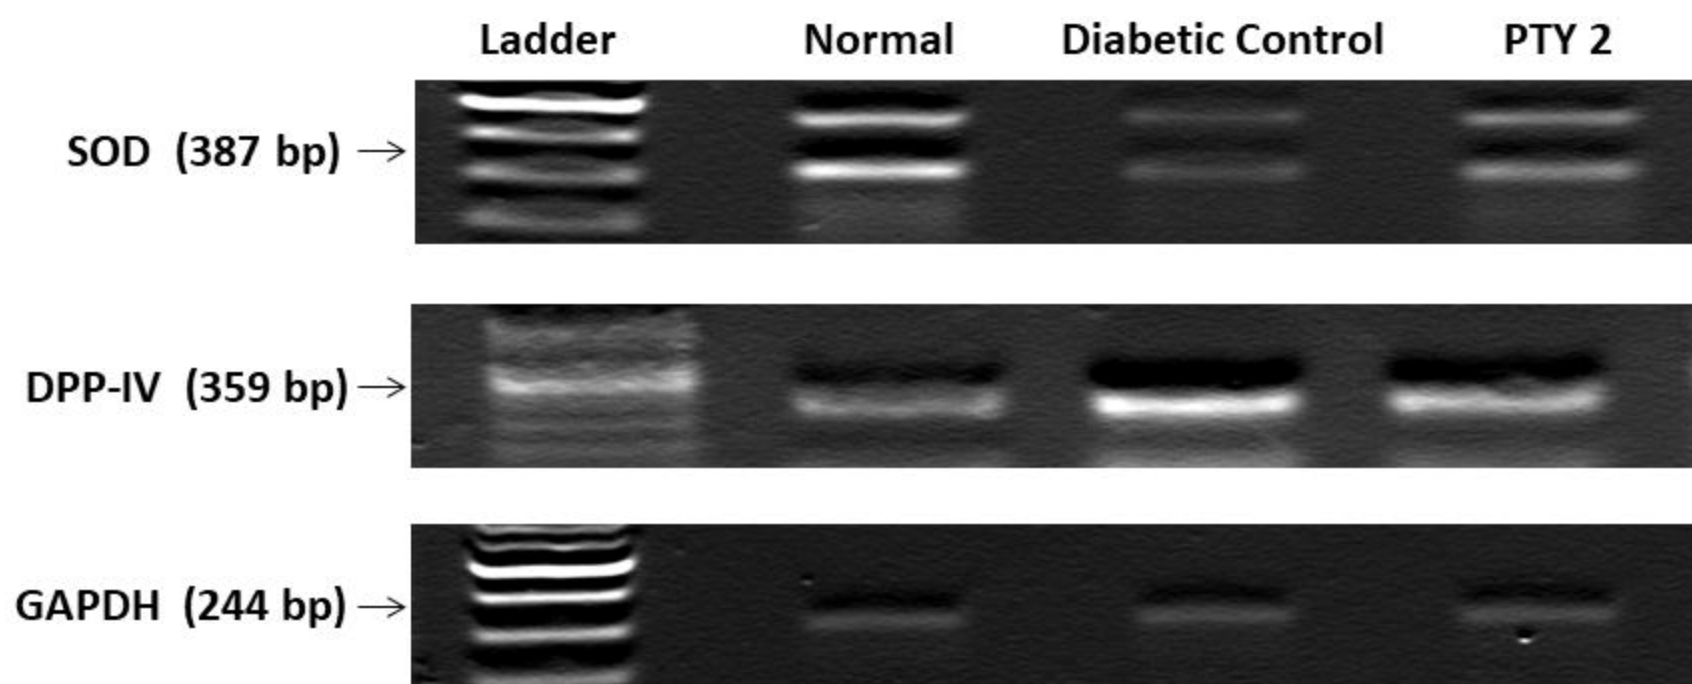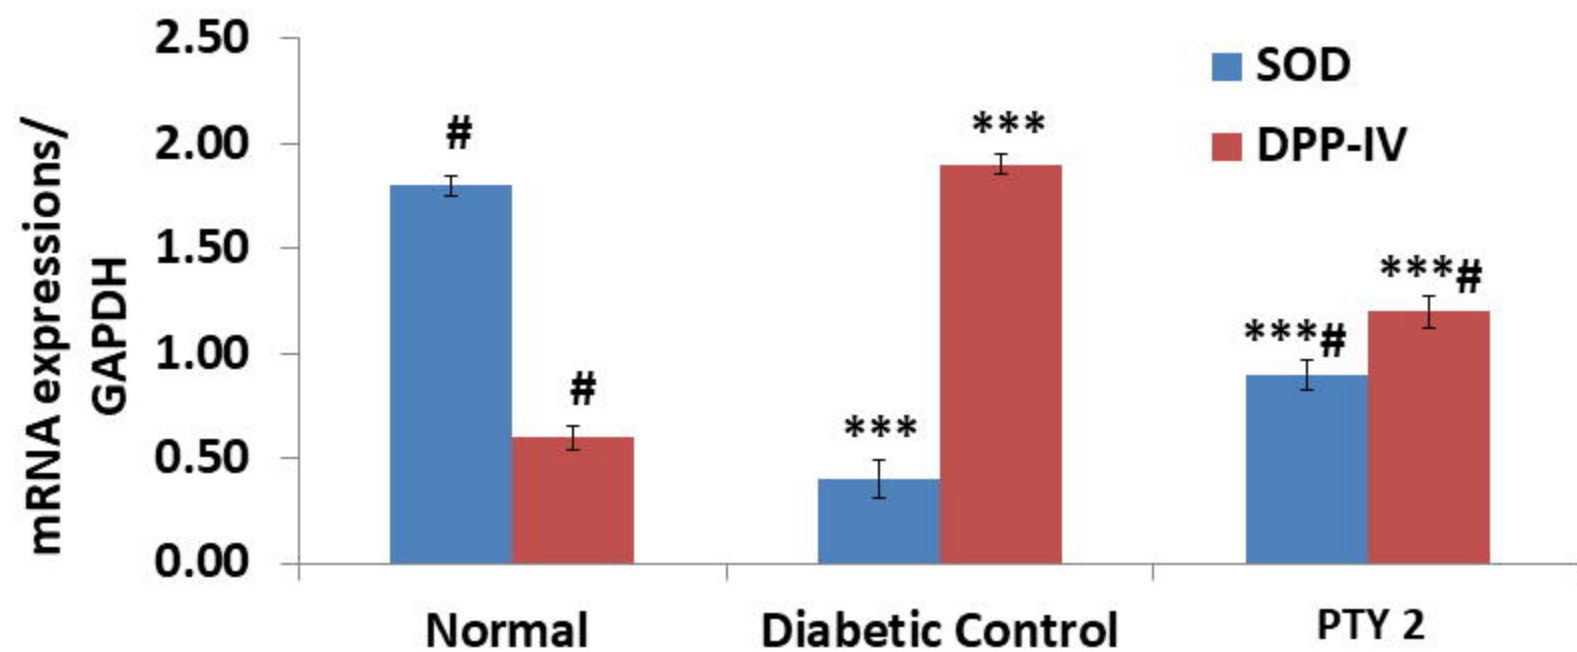

↑ **GLP 1**

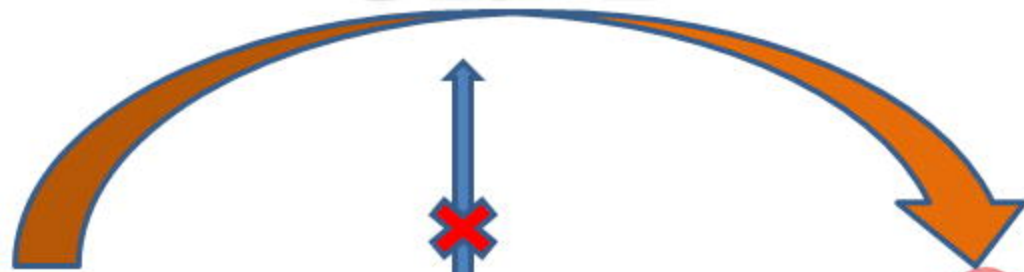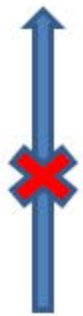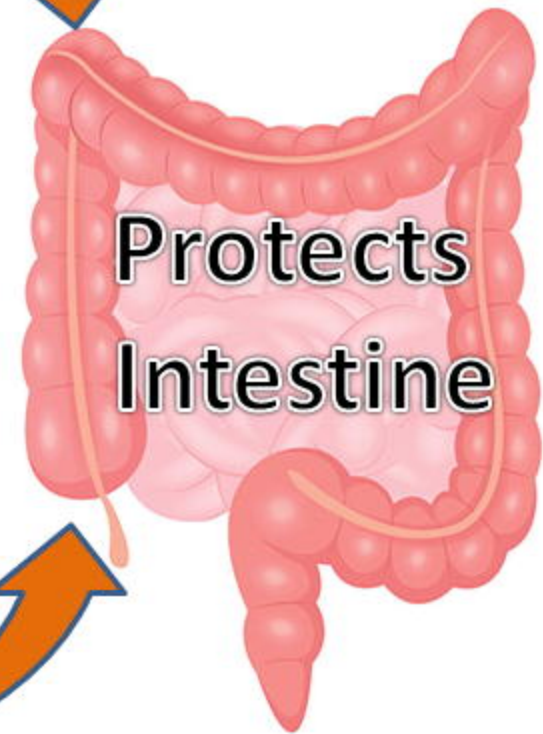

Protects  
Intestine

**PTY 2**

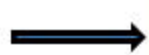

**DPP-IV**

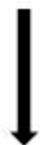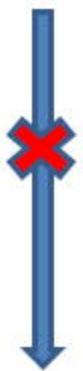

↑ **GLP 2 ?**

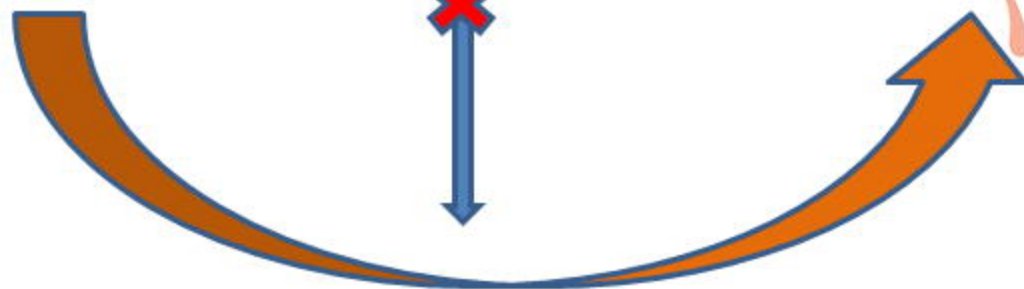

Source: https://www.biorxiv.org/content/10.1101/670430v1.full.pdf
